# Supplementary material for: The Influence of Household- and Community-Level Sanitation and Fecal Sludge Management on Urban Fecal Contamination in Households and Drains and Enteric Infection in Children
Source: PubMed Central journal article supplement (PMC5462580; doi:10.4269/ajtmh.16-0170), 2017-06-07
Supplement: SD6.pdf [file SD6.pdf]

SUPPLEMENTAL INFORMATION

CHRISTIAN MEDICAL COLLEGE HYGIENE SURVEY<sup>28</sup>

| Questions                                                        | Response                                                | Scoring           |
|------------------------------------------------------------------|---------------------------------------------------------|-------------------|
| 1. Do they have a devoted container to store drinking water?     | 0-no; 1-yes                                             | 0-0; 1-1          |
| 2. Is the container covered?                                     | 0-no; 1-yes                                             | 0-0; 1-1          |
| 3. Is there a dipper dedicated for drinking water?               | 0-no; 1-yes; 2-dipper not used                          | (0,2)-0; 1-1      |
| 4. Is the drinking water boiled?*                                | 0-no; 1-yes, for someone; 2- yes for everybody          | 0-0; (1,2)-1      |
| 5. Is the food kept covered?                                     | 0-no; 1-yes                                             | 0-0; 1-1          |
| 6. Are the fruits washed before eating?                          | 0-no; 1-yes                                             | 0-0; 1-1          |
| 7. Cleaning the breast before feeding                            | 0-no; 1-yes; 9-NA                                       | (0,9)-0; 1-1      |
| 8. Are the nails cut properly/without dirt in between the nails? | 0-no; 1-yes                                             | 0-0; 1-1          |
| 9. Washing the hands before feeding                              | 0-no; 1-yes                                             | 0-0; 1-1          |
| 10. Feeding device washed properly                               | 0-no; 1-yes, by soap; 2-yes, by water; 9- NA            | (0,9)-0; 1-1; 2-2 |
| 11. Water available in the toilet*                               | 0-no tap; 1-tap present                                 | 0-0; 1-1          |
| 12. Handwashing after going to toilet*                           | 0-no; 1-water only; 2- water and soap                   | 0-0; 1-1; 2-2     |
| 13. Periodicity of bathing*                                      | 0-not daily; 1-once daily; 2- twice daily               | 0-0; (1,2)-1      |
| 14. Bathing soon after going to toilet*                          | 0-no; 1-yes                                             | 0-0; 1-1          |
| 15. Place of defecation of household*                            | 1-household; 2-public; 3-field; 4-backyard/surroundings | (3,4)-0; (1,2)-1  |
| 16. Where does the child defecate?*                              | 1-household; 2-public; 3-field; 4-backyard/surroundings | (3,4)-0; (1,2)-1  |

Total number of criteria = 16. All the category scores were added up to obtain a final hygiene score. Maximum score = 18. All questions carried 1 score for positive response except "feeding device washed properly" and "handwashing after going to toilet" score 1 for washing with "water alone" and 2 for washing with "water and soap." Bolded values represent the score assigned for a given question.

\*These questions were asked to the respondent whereas the others were observations.

STOOL SPECIMEN PROCESSING

Collected specimens were analyzed for bacteria, helminths, protozoa, and viruses. Bacteria were identified using a variety of methods. Culture-based methods were used for the isolation and identification of *Salmonella*, *Shigella*, *Aeromonas*, *Vibrio*, *Plesiomonas*, *Yersinia*, and *Escherichia coli*, and *E. coli* isolates were further identified as pathogenic *E. coli* using PCR-based assays that were designed to detect Shiga toxin-producing *E. coli*, enterotoxigenic *E. coli*, enteropathogenic *E. coli*, enteroinvasive *E. coli*, and entero-aggregative *E. coli* (EAEC).<sup>29</sup> *Campylobacter* spp. were also analyzed using polymerase chain reaction (PCR)-based methods.<sup>30</sup> Protozoa (*Entamoeba histolytica*, *Cryptosporidium*, and *Giardia* spp.) and viruses (adenovirus, astrovirus, and rotavirus) were evaluated by enzyme-linked immunosorbent assays, with the exception of norovirus, which was identified

by reverse transcription PCR. Other ova and parasites, including soil-transmitted helminths, were identified by morphology using a wet prep and modified acid-fast stain.<sup>29</sup>

QUANTITATIVE REAL-TIME PCR

Total nucleic acids were extracted using the Qiagen Xtractor system (Qiagen Sciences, Germantown, MD), following manufacturer's instructions. EAEC was detected using primers and probes targeting the *aatA* gene.<sup>31</sup> GI norovirus was detected using genogroup-specific COG1 primers and RING1-TP probe, while GII norovirus was detected using the genogroup-specific COG2 primers and RING2-TP probe.<sup>32</sup> The standard curve for EAEC was generated from a plasmid containing the *aatA* gene. The standard curve for GI and GII noroviruses was generated from in vitro transcribed RNA.<sup>33</sup>

SUPPLEMENTAL TABLE 1

Analysis of *Escherichia coli* concentrations in child hand rinses by household- and cluster-level sanitation and FSM\*

|                                                      | $\beta$ † | Standard error | P value |
|------------------------------------------------------|-----------|----------------|---------|
| Household-level                                      |           |                |         |
| Household toilet                                     | 0.04      | 0.40           | 0.92    |
| Toilet contains excreta onsite‡                      | 0.04      | 0.41           | 0.92    |
| Toilet discharges to drain‡                          | 0.56      | 0.41           | 0.17    |
| Open defecation (< 5-year-old)                       | 0.52      | 0.39           | 0.19    |
| Open defecation (adult)                              | 0.34      | 0.43           | 0.44    |
| Any public toilet use (adult)                        | -0.04     | 0.31           | 0.91    |
| High public toilet use (> 10 times per month, adult) | -0.01     | 0.48           | 0.99    |
| Most likely clusters                                 |           |                |         |
| High household toilet coverage                       | -0.44     | 0.44           | 0.32    |
| Low household toilet coverage                        | -0.13     | 0.32           | 0.69    |
| High coverage of poor FSM                            | 0.05      | 0.51           | 0.93    |

\*Multivariate models are presented for each sanitation variable, adjusting for neighborhood and hygiene status ("poor" or "good", as discussed previously), and are separated by a blank row in the table. In all models, interaction terms between the sanitation variable and neighborhood were tested and are indicated with a "/" if significant at  $\alpha = 0.10$ , and  $N = 50$  samples.

†Estimates are in  $\log_{10}$  colony-forming units (CFU)/pair of hands.

‡Reference population is households without a toilet or those with "other" FSM practices.

SUPPLEMENTAL TABLE 2

Analysis of *Escherichia coli* concentrations in household swabs by household- and cluster-level sanitation and FSM\*

|                                                      | $\beta$ † | Standard error | P value |
|------------------------------------------------------|-----------|----------------|---------|
| Household level                                      |           |                |         |
| Household toilet                                     | -0.14     | 0.49           | 0.78    |
| Household toilet/Old Town                            | 1.15      | 0.59           | 0.06    |
| Toilet contains excreta onsite‡                      | 0.33      | 0.38           | 0.39    |
| Toilet discharges to drain‡                          | 0.57      | 0.38           | 0.15    |
| Open defecation (< 5-year-old)                       | 0.24      | 0.37           | 0.52    |
| Open defecation (adult)                              | 0.10      | 0.49           | 0.84    |
| Open defecation (adult)/neighborhood: Old Town       | -1.15     | 0.59           | 0.06    |
| Any public toilet use (adult)                        | 0.41      | 0.29           | 0.16    |
| High public toilet use (> 10 times per month, adult) | 0.52      | 0.45           | 0.25    |
| Most likely clusters                                 |           |                |         |
| High household toilet coverage                       | -0.27     | 0.42           | 0.52    |
| Low household toilet coverage                        | 0.43      | 0.39           | 0.27    |
| Low cluster of household toilet coverage/Old Town    | -1.38     | 0.56           | 0.02    |
| High coverage of poor FSM                            | 0.42      | 0.48           | 0.39    |

FSM = fecal sludge management.

\*Multivariate models are presented for each sanitation variable, adjusting for neighborhood and hygiene status ("poor" or "good", as discussed previously), and are separated by a blank row in the table. In all models, interaction terms between the sanitation variable and neighborhood were tested and are indicated with a "/" if significant at  $\alpha = 0.10$ , and  $N = 50$  samples.

†Estimates are in  $\log_{10}$  colony-forming units (CFU)/125  $\text{cm}^2$ .

‡Reference population is households without a toilet or those with "other" FSM practices.

SUPPLEMENTAL TABLE 3

Analysis of *Escherichia coli* concentrations in sentinel object rinses by household- and cluster-level sanitation and FSM\*

|                                                      | $\beta$ † | Standard error | P value |
|------------------------------------------------------|-----------|----------------|---------|
| Household level                                      |           |                |         |
| Household toilet                                     | 0.06      | 0.30           | 0.83    |
| Toilet contains excreta onsite‡                      | 0.03      | 0.30           | 0.91    |
| Toilet discharges to drain‡                          | 0.16      | 0.30           | 0.60    |
| Open defecation (< 5-year-old)                       | 0.37      | 0.29           | 0.20    |
| Open defecation (adult)                              | -0.14     | 0.32           | 0.66    |
| Any public toilet use (adult)                        | -0.14     | 0.23           | 0.54    |
| High public toilet use (> 10 times per month, adult) | -0.08     | 0.35           | 0.82    |
| Cluster level                                        |           |                |         |
| High household toilet coverage                       | -0.08     | 0.33           | 0.80    |
| Low household toilet coverage                        | -0.01     | 0.24           | 0.97    |
| High coverage of poor FSM                            | -0.14     | 0.37           | 0.71    |

FSM = fecal sludge management.

\*Multivariate models are presented for each sanitation variable, adjusting for neighborhood and hygiene status ("poor" or "good", as discussed previously), and are separated by a blank row in the table. In all models, interaction terms between the sanitation variable and neighborhood were tested and are indicated with a "/" if significant at  $\alpha = 0.10$ , and  $N = 49$  samples.

†Estimates are in  $\log_{10}$  colony-forming units (CFU)/100 mL.

‡Reference population is households without a toilet or those with "other" FSM practices.
